# Supplementary material
Source: PubMed Central journal article supplement (PMC4944488)
Supplement: mmc1.pdf [file mmc1.pdf]

**Biophysical Journal, Volume 111**

**Supplemental Information**

**Mode of Action of Antimicrobial Peptides on *E. coli* Spheroplasts**

**Yen Sun, Tzu-Lin Sun, and Huey W. Huang**

## Supplemental Information

### The mode of action of antimicrobial peptides on *E. coli* spheroplasts

Yen Sun, Tzu-Lin Sun and Huey W. Huang

Department of Physics & Astronomy, Rice University, Houston Texas 77005

#### S1. Details of FRAP analysis

(1) Measurement of  $\tau_e$ . During a dark period, the intracellular unbleached dye concentration  $C(t)$  increased from the steady state value  $C_s$  to a higher value  $C_i$  when illumination resumed. Thereafter,  $C(t)$  followed the kinetics:

$$C(t) - C_s = (C_i - C_s)e^{-t/\tau_e}$$

The decay constant  $\tau_e$  was measured by curve fitting shown in Fig. S1.

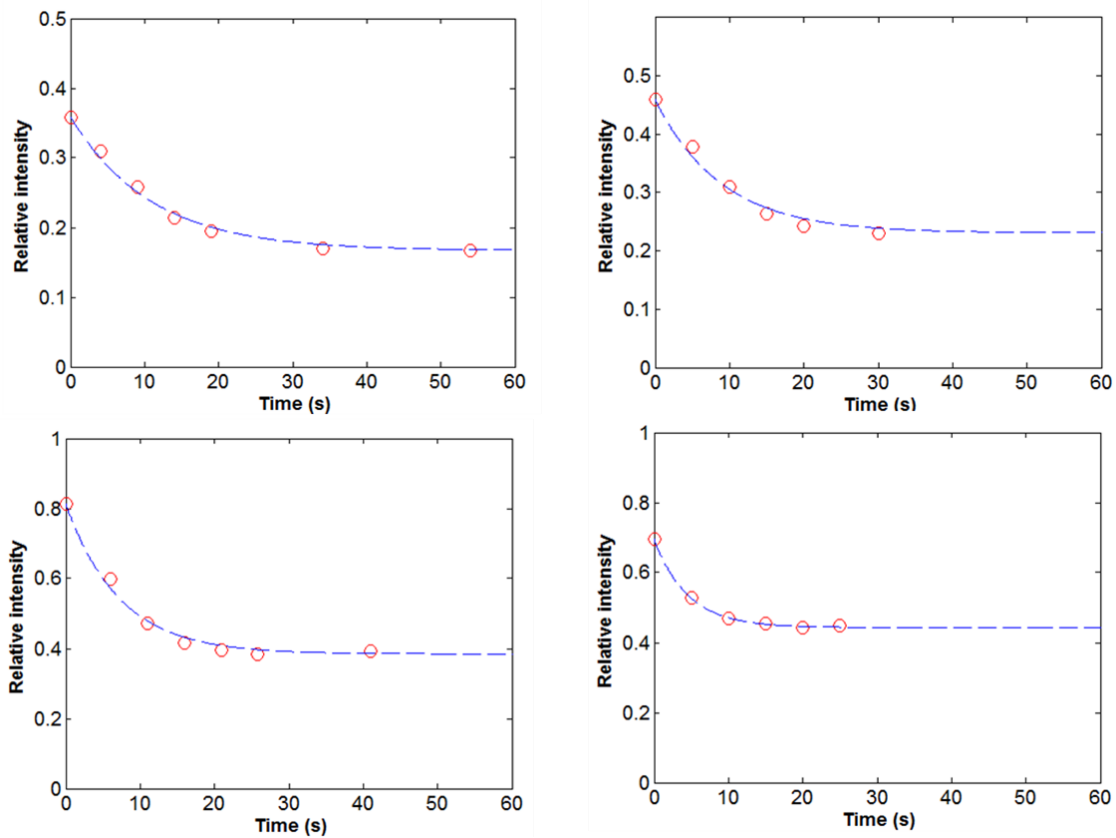

Fig. S1 Four examples of FRAP. Each was well fit by an exponential curve from which the value of  $\tau_e$  was obtained.

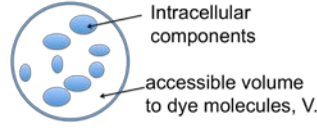

Fig. S2 Accessible volume in a cell

(2) We measured the intracellular fluorescence intensity,  $F$ , over the whole cell (Fig. S2). The intensity is proportional to the total number of unbleached fluorescence molecules within the measured volume. If the dye concentration  $C$  in the accessible volume  $V$  were the same as the extracellular concentration  $C_{out}$  which produced the extracellular fluorescence intensity  $F_{out}$ , the result would be

$$\frac{F}{F_{out}} = \frac{CV}{C_{out}V_{cell}} = \frac{V}{V_{cell}} \equiv x$$

Therefore, in all conditions, the correct ratio of the intracellular concentration  $C$  to the extracellular concentration  $C_{out}$  is obtained by the fluorescence measurement using the relation:

$$\frac{C}{C_{out}} = \frac{F}{F_{out} \cdot x}$$

Thus from  $j_c = C_s V / C_{out} \tau_e$ , we obtain  $j_c = (F_s / F_{out}) V_{cell} / \tau_e$ .

(3) There is a second way of obtaining the value of  $j_c$ . During a dark period, there is no photobleaching, the kinetic equation for  $C(t)$  becomes

$$\frac{dC(t)}{dt} = -\frac{j_c}{V} C(t) + \frac{j_c}{V} C_{out}$$

During the steady state,  $j_c$  is constant, the equation can be integrated over the dark period:  $C_{out} - C_i = (C_{out} - C_s) e^{-t1/\tau_j}$ , where  $t1$  is the duration of the dark period,  $\frac{1}{\tau_j} = \frac{j_c}{V}$ ,  $C_s$  and  $C_i$  are the initial and final value of  $C(t)$ . Thus we can evaluate  $\tau_j$  by:

$$1 - \frac{F_i}{F_{out} \cdot x} = \left(1 - \frac{F_s}{F_{out} \cdot x}\right) e^{-t1/\tau_j}$$

Then  $j_c$  is given by

$$j_c = \frac{V_{cell} \cdot x}{\tau_j}$$

The number of the hypothetical Berg-Purcell pores,  $N$ , was obtained by the formula  $j_c = 4aDN$ . The results obtained by two methods are compared in Fig. S3.

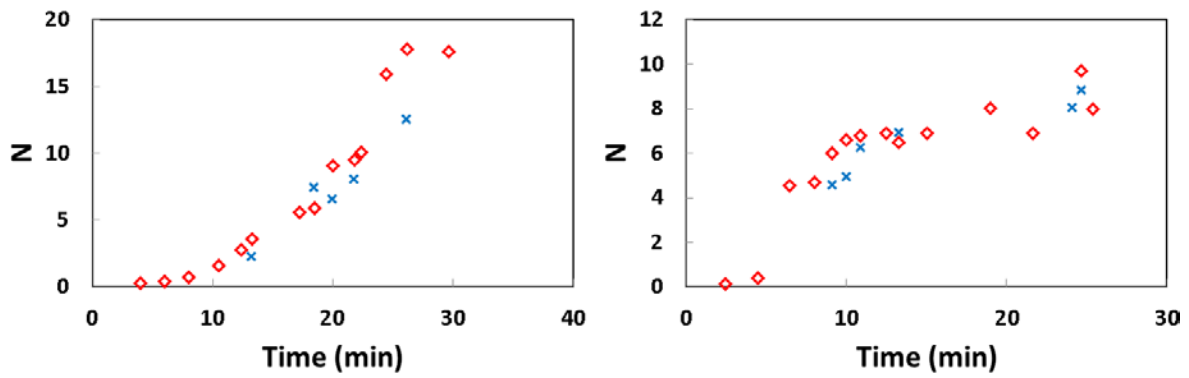

Fig. S3 The number of the hypothetical Berg-Purcell pores obtained from the two experiments shown in Fig. 2 by the first method (shown in red) and by the second method (shown in blue). The two methods yielded results close to each other.
